# Supplementary material
Source: publisher figshare collection journal article supplement (https://acs.figshare.com/ndownloader/files/4614718)
Supplement: Supplementary file 1 [file 4614718]

Supporting Information for

Examining Förster energy transfer for semiconductor nanocrystalline quantum dot donors and acceptors

*Carles Curutchet,<sup>1</sup> Alberto Franceschetti,<sup>2</sup> Alex Zunger,<sup>2</sup> and Gregory D. Scholes<sup>1</sup>*

1 Department of Chemistry, 80 St. George Street, Institute for Optical Sciences, and Centre for Quantum Information and Quantum Control, University of Toronto, Toronto, Ontario M5S 3H6 Canada

2 National Renewable Energy Laboratory, Golden, Colorado 80401, USA

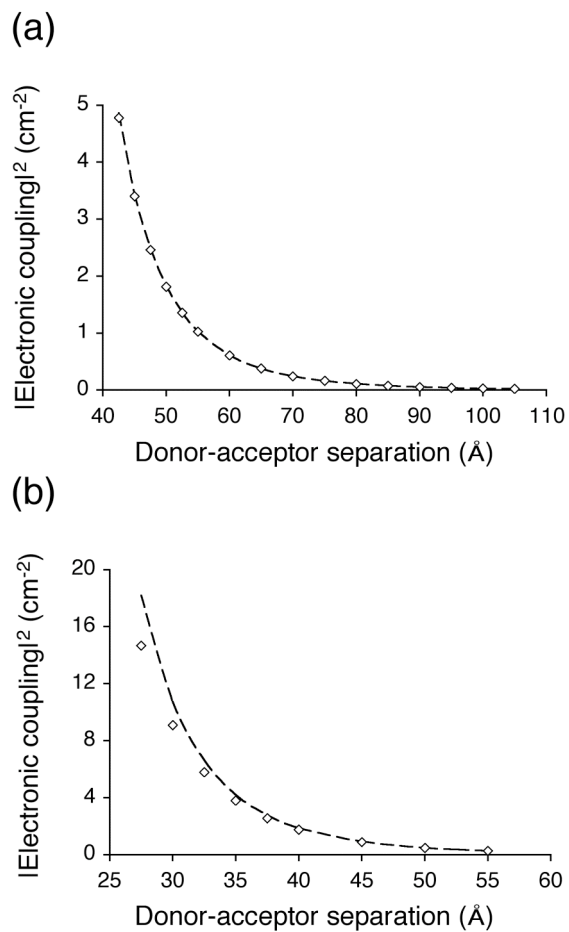

**Figure SI-1.** Squared electronic couplings predicted by the full 3D expression (diamonds) and by the point-dipole approximation (dashed lines) for donor-acceptor pairs in the DL orientation as a function of their center-to-center separation. (a) Two 3.9 nm CdSe QDs. (b) A 3.9 nm CdSe QD and a chlorophyll molecule.

**Table SI-1.** Components in the crystallographic axis of the complex transition dipole moment (in Debye) of the CdSe QD considered in this work.

|       | X             | Y              | Z   |
|-------|---------------|----------------|-----|
| $\mu$ | 4.4- $i$ ·2.9 | -1.2+ $i$ ·6.2 | 0.0 |

**Table SI-2.** Squared electronic couplings obtained from the full 3D expression and the point-dipole approximation between two 3.9 nm CdSe QDs in the FF orientation as a function of the center-center separation. EET times ( $\tau = 1/k_{EET}$ ) estimated from the corresponding couplings, an experimental spectral overlap  $J = 10^{-4}$ cm as obtained in Ref [1], and a screening factor  $s=1$ . Distances, squared couplings, and time constants are in Å, cm<sup>-2</sup> and ns, respectively.

| $R$   | $ V_{dip-dip} ^2$ | $ V_s^{(3D)} ^2$ | $\tau_{dip-dip}$ | $\tau_{3D}$ |
|-------|-------------------|------------------|------------------|-------------|
| 42.5  | 10.09             | 10.11            | 0.84             | 0.84        |
| 45.0  | 7.16              | 7.18             | 1.18             | 1.18        |
| 47.5  | 5.18              | 5.19             | 1.63             | 1.63        |
| 50.0  | 3.81              | 3.82             | 2.22             | 2.21        |
| 52.5  | 2.84              | 2.85             | 2.97             | 2.97        |
| 55.0  | 2.15              | 2.16             | 3.93             | 3.92        |
| 60.0  | 1.27              | 1.28             | 6.63             | 6.61        |
| 65.0  | 0.79              | 0.79             | 10.72            | 10.68       |
| 70.0  | 0.51              | 0.51             | 16.72            | 16.67       |
| 75.0  | 0.33              | 0.34             | 25.29            | 25.22       |
| 80.0  | 0.23              | 0.23             | 37.24            | 37.15       |
| 85.0  | 0.16              | 0.16             | 53.58            | 53.46       |
| 90.0  | 0.11              | 0.11             | 75.51            | 75.34       |
| 95.0  | 0.08              | 0.08             | 104.44           | 104.22      |
| 100.0 | 0.06              | 0.06             | 142.08           | 141.81      |
| 105.0 | 0.04              | 0.04             | 190.40           | 190.08      |

**Table SI-3.** Squared electronic couplings obtained from the full 3D expression and the point-dipole approximation between two 3.9 nm CdSe QDs in the HT orientation as a function of the center-center separation. EET times ( $\tau = 1/k_{EET}$ ) estimated from the corresponding couplings, an experimental spectral overlap  $J=10^{-4}\text{cm}$  as obtained in Ref [1], and a screening factor  $s=1$ . Distances, squared couplings, and time constants are in Å,  $\text{cm}^{-2}$  and ns, respectively.

| $R$   | $ V_{dip-dip} ^2$ | $ V_s^{(3D)} ^2$ | $\tau_{dip-dip}$ | $\tau_{3D}$ |
|-------|-------------------|------------------|------------------|-------------|
| 42.5  | 31.44             | 32.15            | 0.27             | 0.26        |
| 45.0  | 22.31             | 22.78            | 0.38             | 0.37        |
| 47.5  | 16.13             | 16.45            | 0.52             | 0.51        |
| 50.0  | 11.86             | 12.07            | 0.71             | 0.70        |
| 52.5  | 8.85              | 9.00             | 0.95             | 0.94        |
| 55.0  | 6.69              | 6.80             | 1.26             | 1.24        |
| 60.0  | 3.97              | 4.03             | 2.13             | 2.10        |
| 65.0  | 2.46              | 2.49             | 3.44             | 3.40        |
| 70.0  | 1.57              | 1.59             | 5.36             | 5.31        |
| 75.0  | 1.04              | 1.05             | 8.12             | 8.04        |
| 80.0  | 0.71              | 0.71             | 11.95            | 11.85       |
| 85.0  | 0.49              | 0.49             | 17.20            | 17.07       |
| 90.0  | 0.35              | 0.35             | 24.23            | 24.07       |
| 95.0  | 0.25              | 0.25             | 33.52            | 33.32       |
| 100.0 | 0.19              | 0.19             | 45.60            | 45.35       |
| 105.0 | 0.14              | 0.14             | 61.11            | 60.80       |

**Table SI-4.** Squared electronic couplings obtained from the full 3D expression and the point-dipole approximation between two 3.9 nm CdSe QDs in the DL orientation as a function of the center-center separation. EET times ( $\tau = 1/k_{EET}$ ) estimated from the corresponding couplings, an experimental spectral overlap  $J=10^{-4}\text{cm}$  as obtained in Ref [1], and a screening factor  $s=1$ . Distances, squared couplings, and time constants are in Å,  $\text{cm}^{-2}$  and ns, respectively.

| $R$   | $ V_{dip-dip} ^2$ | $ V_s^{(3D)} ^2$ | $\tau_{dip-dip}$ | $\tau_{3D}$ |
|-------|-------------------|------------------|------------------|-------------|
| 42.5  | 4.86              | 4.78             | 1.74             | 1.77        |
| 45.0  | 3.45              | 3.40             | 2.45             | 2.49        |
| 47.5  | 2.49              | 2.46             | 3.39             | 3.43        |
| 50.0  | 1.83              | 1.81             | 4.61             | 4.66        |
| 52.5  | 1.37              | 1.36             | 6.18             | 6.23        |
| 55.0  | 1.03              | 1.03             | 8.16             | 8.23        |
| 60.0  | 0.61              | 0.61             | 13.76            | 13.84       |
| 65.0  | 0.38              | 0.38             | 22.25            | 22.35       |
| 70.0  | 0.24              | 0.24             | 34.70            | 34.83       |
| 75.0  | 0.16              | 0.16             | 52.50            | 52.66       |
| 80.0  | 0.11              | 0.11             | 77.32            | 77.52       |
| 85.0  | 0.08              | 0.08             | 111.25           | 111.49      |
| 90.0  | 0.05              | 0.05             | 156.75           | 157.04      |
| 95.0  | 0.04              | 0.04             | 216.83           | 217.17      |
| 100.0 | 0.03              | 0.03             | 294.97           | 295.37      |
| 105.0 | 0.02              | 0.02             | 395.28           | 395.76      |

**Table SI-5.** Squared electronic couplings obtained from the full 3D expression and the point-dipole approximation between a chlorophyll molecule and a 3.9 nm CdSe QD in the FF orientation as a function of the center-center separation. EET times ( $\tau = 1/k_{EET}$ ) estimated from the corresponding couplings, a standard value for the spectral overlap  $J=10^{-4}\text{cm}$ , and a screening factor  $s=1$ . Distances, squared couplings, and time constants are in Å,  $\text{cm}^{-2}$  and ns, respectively.

| $R$  | $ V_{dip-dip} ^2$ | $ V_s^{(3D)} ^2$ | $\tau_{dip-dip}$ | $\tau_{3D}$ |
|------|-------------------|------------------|------------------|-------------|
| 22.5 | 226.88            | 193.59           | 0.04             | 0.04        |
| 25.0 | 121.07            | 106.38           | 0.07             | 0.08        |
| 27.5 | 68.57             | 61.63            | 0.12             | 0.14        |
| 30.0 | 40.80             | 37.31            | 0.21             | 0.23        |
| 32.5 | 25.30             | 23.46            | 0.33             | 0.36        |
| 35.0 | 16.25             | 15.23            | 0.52             | 0.55        |
| 37.5 | 10.76             | 10.18            | 0.79             | 0.83        |
| 40.0 | 7.32              | 6.97             | 1.15             | 1.21        |
| 45.0 | 3.62              | 3.48             | 2.33             | 2.42        |
| 50.0 | 1.93              | 1.87             | 4.38             | 4.52        |
| 55.0 | 1.09              | 1.06             | 7.75             | 7.95        |

**Table SI-6.** Squared electronic couplings obtained from the full 3D expression and the point-dipole approximation between a chlorophyll molecule and a 3.9 nm CdSe QD in the HT orientation as a function of the center-center separation. EET times ( $\tau = 1/k_{EET}$ ) estimated from the corresponding couplings, a standard value for the spectral overlap  $J=10^{-4}\text{cm}$ , and a screening factor  $s=1$ . Distances, squared couplings, and time constants are in Å,  $\text{cm}^{-2}$  and ns, respectively.

| $R$  | $ V_{dip-dip} ^2$ | $ V_s^{(3D)} ^2$ | $\tau_{dip-dip}$ | $\tau_{3D}$ |
|------|-------------------|------------------|------------------|-------------|
| 27.5 | 279.76            | 306.69           | 0.03             | 0.03        |
| 30.0 | 166.04            | 179.44           | 0.05             | 0.05        |
| 32.5 | 102.76            | 109.73           | 0.08             | 0.08        |
| 35.0 | 65.90             | 69.69            | 0.13             | 0.12        |
| 37.5 | 43.57             | 45.72            | 0.19             | 0.18        |
| 40.0 | 29.59             | 30.85            | 0.29             | 0.27        |
| 45.0 | 14.60             | 15.07            | 0.58             | 0.56        |
| 50.0 | 7.76              | 7.96             | 1.09             | 1.06        |
| 55.0 | 4.38              | 4.47             | 1.93             | 1.89        |

**Table SI-7.** Squared electronic couplings obtained from the full 3D expression and the point-dipole approximation between a chlorophyll molecule and a 3.9 nm CdSe QD in the DL orientation as a function of the center-center separation. EET times ( $\tau = 1/k_{EET}$ ) estimated from the corresponding couplings, a standard value for the spectral overlap  $J=10^{-4}\text{cm}$ , and a screening factor  $s=1$ . Distances, squared couplings, and time constants are in Å,  $\text{cm}^{-2}$  and ns, respectively.

| $R$  | $ V_{dip-dip} ^2$ | $ V_s^{(3D)} ^2$ | $\tau_{dip-dip}$ | $\tau_{3D}$ |
|------|-------------------|------------------|------------------|-------------|
| 27.5 | 18.20             | 14.67            | 0.46             | 0.58        |
| 30.0 | 10.74             | 9.09             | 0.79             | 0.93        |
| 32.5 | 6.62              | 5.81             | 1.28             | 1.46        |
| 35.0 | 4.23              | 3.81             | 2.00             | 2.22        |
| 37.5 | 2.79              | 2.56             | 3.03             | 3.30        |
| 40.0 | 1.89              | 1.76             | 4.48             | 4.79        |
| 45.0 | 0.93              | 0.89             | 9.12             | 9.54        |
| 50.0 | 0.49              | 0.48             | 17.22            | 17.76       |
| 55.0 | 0.28              | 0.27             | 30.59            | 31.25       |

## References.

- (1) Scholes, G. D.; Andrews, D. L. *Phys. Rev. B* **2005**, 72, 125331.
